# Supplementary material
Source: MDPI journal article supplement (https://www.mdpi.com/2073-4344/9/2/171)
Supplement: s1 [file s1]

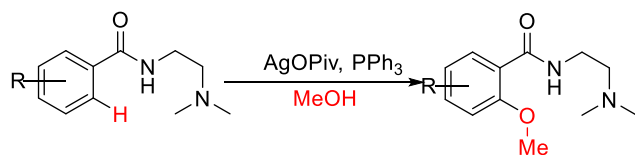

R=H, Me, OMe, CN, CF<sub>3</sub>, OCF<sub>3</sub>, F, Cl, Br, NO<sub>2</sub>, Ph 18 examples  
up to 72%

Silver-mediated methoxylation of aryl C(*sp*<sup>2</sup>)-H bonds with methanol was established, affording alkyl aryl ethers in broad substrate scope and high regioselectivity.
